# Supplementary material
Source: PubMed Central journal article supplement (PMC9385776)
Supplement: mmc1.pdf [file mmc1.pdf]

Supplementary Information for  
**Public transit cuts during COVID-19 compound social vulnerability  
in 22 US cities**

**Armita Kar, Andre L. Carrel, Harvey J. Miller, Huyen T. K. Le\***

**Table of Contents**

|   |                                                                                                                                              |    |
|---|----------------------------------------------------------------------------------------------------------------------------------------------|----|
| 1 | Transit data sources and time frames.....                                                                                                    | 3  |
| 2 | Selection criteria for grocery stores and health care facilities.....                                                                        | 4  |
| 3 | Measuring transit-based access using average isochrones .....                                                                                | 5  |
| 4 | Description of socio-economic variables.....                                                                                                 | 6  |
| 5 | Descriptive statistics.....                                                                                                                  | 7  |
| 6 | Kruskal-Wallis tests for comparing the changes in transit access by socio-economic groups:<br>Accessibility with 30-minute travel time ..... | 8  |
| 7 | Goodness of fit statistics of multilevel models: Accessibility with 30-minute travel time .....                                              | 13 |
| 8 | Spatial patterns of reductions in transit-based accessibility during off-peak hours .....                                                    | 13 |
| 9 | Sensitivity analysis: Accessibility with 45-minutes travel time .....                                                                        | 14 |
|   | References.....                                                                                                                              | 17 |

**List of Figures**

|          |                                                                                                     |    |
|----------|-----------------------------------------------------------------------------------------------------|----|
| Fig. S1: | Pearson correlation coefficients for the socio-economic variables.....                              | 6  |
| Fig. S2: | Probability of losing transit access in the lockdown and post-lockdown phases (off-peak hours)..... | 14 |
| Fig. S3: | Social determinants of transit access loss using 45-minutes isochrone measure .....                 | 15 |
| Fig. S4: | Correlation between urban sprawl index and service cuts using 45-minutes isochrone measure.. .....  | 16 |

**List of Tables**

|          |                                                                                                                                                           |   |
|----------|-----------------------------------------------------------------------------------------------------------------------------------------------------------|---|
| Table S1 | Transit agencies used for each study area and dates used in each study period for measuring accessibility .....                                           | 3 |
| Table S2 | Selection criteria for grocery stores .....                                                                                                               | 4 |
| Table S3 | Selection Criteria for health care facilities .....                                                                                                       | 5 |
| Table S4 | Socio-economic variables at the block group level .....                                                                                                   | 6 |
| Table S5 | Descriptive statistics for changes in transit-based access to food during peak hours using a 30-minute total travel time threshold. ....                  | 7 |
| Table S6 | Descriptive statistics for changes in transit-based access to non-urgent healthcare during peak hours using a 30-minute total travel time threshold. .... | 7 |
| Table S7 | Descriptive statistics for changes in transit-based access to urgent healthcare during peak hours using a 30-minute total travel time threshold. ....     | 7 |

Table S8 | Kruskal-Wallis test results for changes in transit-based access to food and healthcare during peak and off-peak hours using a 30-minute total travel time threshold.....8

Table S9 | Goodness of fit statistics of the multilevel binary logit models for the changes in transit-based access to food and healthcare during peak hours using a 30-minute total travel time threshold.....12

## 1 Transit data sources and time frames

We identified the major transit service provider for bus, light rail, and subway services for each city. In addition, we considered multiple agencies for New York and Seattle, where separate transit providers offer bus and rail services. For these two cities, we combined the GTFS datasets and analyzed them as if they were from one single provider. This combination allowed us to determine accessibility for riders who transfer between different transit service providers.

Our study area for each city contains block groups that fall within a half-mile buffer around each transit stop, based on the transit networks during the pre-lockdown period. This ensures that the block groups within our study areas were supported with one or multiple transit services before the pandemic started.

We obtained transit schedule and route information of 22 transit agencies using the static General Transit Feed Specification (GTFS) data from the OpenMobilityData website (Table S1) (GTFS, 2020). GTFS static data provide information regarding transit routes, stops or stations, schedules, transfers, and fares. Assuming that the weekday transit schedule is fixed (i.e., the same for all weekdays in each city), we measured accessibility on a Tuesday (a regular weekday) of each study period. The specific Tuesday was determined with our routes-based date selection criteria.

**Table S1 | Transit agencies used for each study area and dates used in each study period for measuring accessibility**

| Name                      | Transit agency | Public transit mode(s)      | Pre-lockdown phase<br>(highest number of routes<br>between January-February) |                  | Lockdown phase<br>(Lowest number of routes between<br>March-June) |                  | Post-lockdown phase<br>(highest number of routes<br>between November-December) |                  |
|---------------------------|----------------|-----------------------------|------------------------------------------------------------------------------|------------------|-------------------------------------------------------------------|------------------|--------------------------------------------------------------------------------|------------------|
|                           |                |                             | Date                                                                         | Number of routes | Date                                                              | Number of routes | Date                                                                           | Number of routes |
| <b>Ann Arbor</b>          | The Ride       | Bus                         | 28-Jan                                                                       | 34               | 31-Mar                                                            | 21               | 17-Nov                                                                         | 17               |
| <b>Atlanta</b>            | MARTA          | Bus, subway                 | 7-Jan                                                                        | 115              | 28-Apr                                                            | 47               | 8-Dec                                                                          | 58               |
| <b>Austin</b>             | Capital Metro  | Bus, light rail             | 7-Jan                                                                        | 84               | 31-Mar                                                            | 56               | 1-Dec                                                                          | 70               |
| <b>Boston</b>             | MBTA           | Bus, light rail, subway     | 7-Jan                                                                        | 235              | 10-Mar                                                            | 237              | 15-Dec                                                                         | 240              |
| <b>Champaign - Urbana</b> | CUMTD          | Bus                         | 7-Jan                                                                        | 102              | 12-May                                                            | 102              | 24-Nov                                                                         | 103              |
| <b>Chicago</b>            | CTA            | Bus, subway                 | 7-Jan                                                                        | 134              | 21-Apr                                                            | 134              | 24-Nov                                                                         | 136              |
| <b>Columbus</b>           | COTA           | Bus                         | 7-Jan                                                                        | 47               | 5-May                                                             | 21               | 8-Dec                                                                          | 23               |
| <b>Dallas</b>             | DART           | Bus, light rail, cable tram | 7-Jan                                                                        | 161              | 7-Apr                                                             | 151              | 8-Dec                                                                          | 148              |
| <b>Denver</b>             | RTD            | Bus, light rail             | 7-Jan                                                                        | 160              | 26-May                                                            | 151              | 24-Nov                                                                         | 110              |
| <b>Los Angeles</b>        | LA Metro       | Bus, light rail, subway     | 14-Jan                                                                       | 138              | 23-Jun                                                            | 133              | 1-Dec                                                                          | 134              |
| <b>Louisville</b>         | TARC           | Bus                         | 28-Jan                                                                       | 47               | 31-Mar                                                            | 47               | 17-Nov                                                                         | 31               |
| <b>Madison</b>            | Metro Madison  | Bus                         | 4-Feb                                                                        | 126              | 24-Mar                                                            | 63               | 8-Dec                                                                          | 126              |
| <b>Miami</b>              | MDC            | Bus, light rail             | 25-Feb                                                                       | 133              | 28-Apr                                                            | 119              | 3-Nov                                                                          | 124              |
| <b>Nashville</b>          | MTA            | Bus                         | 28-Jan                                                                       | 45               | 7-Apr                                                             | 45               | 24-Nov                                                                         | 42               |
| <b>New York City</b>      | MTA, MTABC     | Bus, subway                 | 7-Jan                                                                        | 362              | 5-May                                                             | 322              | 1-Dec                                                                          | 364              |

|                       |                                  |                             | Pre-lockdown phase<br>(highest number of routes<br>between January-February) |     | Lockdown phase<br>(Lowest number of routes between<br>March-June) |     | Post-lockdown phase<br>(highest number of routes<br>between November-December) |     |
|-----------------------|----------------------------------|-----------------------------|------------------------------------------------------------------------------|-----|-------------------------------------------------------------------|-----|--------------------------------------------------------------------------------|-----|
| <b>Philadelphia</b>   | SEPTA                            | Bus, light rail, subway     | 28-Jan                                                                       | 139 | 14-Apr                                                            | 61  | 17-Nov                                                                         | 138 |
| <b>Phoenix</b>        | Valley Metro                     | Bus, light rail             | 21-Jan                                                                       | 105 | 14-Apr                                                            | 100 | 1-Dec                                                                          | 104 |
| <b>Portland</b>       | TriMet                           | Bus, light rail             | 14-Jan                                                                       | 99  | 21-Apr                                                            | 94  | 15-Dec                                                                         | 94  |
| <b>San Francisco</b>  | SFMTA                            | Bus, light rail, cable tram | 28-Jan                                                                       | 84  | 14-Apr                                                            | 21  | 1-Dec                                                                          | 37  |
| <b>San Jose</b>       | VTA                              | Bus, light rail             | 28-Jan                                                                       | 83  | 31-Mar                                                            | 46  | 1-Dec                                                                          | 58  |
| <b>Seattle</b>        | King County Metro, Sound Transit | Bus, light rail             | 4-Feb                                                                        | 225 | 9-Jun                                                             | 190 | 8-Dec                                                                          | 132 |
| <b>Salt Lake City</b> | UTA                              | Bus, light rail             | 14-Jan                                                                       | 123 | 28-Apr                                                            | 118 | 24-Nov                                                                         | 109 |

## 2 Selection criteria for grocery stores and health care facilities

We obtained data on grocery stores and health care facilities from InfoGroup (InfoGroup, 2019). This dataset contains information on the geographic locations of each facility, their North American Industry Classification System (NAICS) code, and their business characteristics (e.g., sales volume and employee size).

We selected grocery stores based on the NAICS code, retailer brand names, and scale of businesses. Based on distribution across all supermarkets and grocery stores (NAICS 445110) in our selected cities (in descending order), we determined an employee size of 80 and a sales volume of 17.5 million as the threshold representing the top 10<sup>th</sup> percentile. Our study therefore includes supermarkets and grocery stores with an employee size and sales volume above these threshold values. In addition, we manually selected national-level warehouse clubs, supercenters, and department stores that sell grocery products. Table S2 provides the detailed grocery store selection criteria used in this study.

**Table S2 | Selection criteria for grocery stores**

| Store type                              | NAICS  | Criteria                                                                                                                 | Example store names                                                  |
|-----------------------------------------|--------|--------------------------------------------------------------------------------------------------------------------------|----------------------------------------------------------------------|
| <b>Supermarkets and grocery stores</b>  | 445110 | Employee size > 80 and sales volume > 17.5 million (top 10 <sup>th</sup> percentile among all stores in our study areas) | Trader Joe’s, Meijer, Whole Food Market, Kroger, Hy-Vee, and Safeway |
| <b>Warehouse clubs and supercentres</b> | 452910 | National-level retailer brands that sell groceries                                                                       | Costco Wholesale, Sam’s Club and BJ’s, and Walmart                   |
| <b>Department stores</b>                | 452111 |                                                                                                                          | Target                                                               |

Similarly, we categorized health care locations into urgent and non-urgent health care facilities based on their NAICS code. Urgent health care includes general hospitals (NAICS 622110) and emergency care services (NAICS 621493). Non-urgent health care includes specialty hospitals (NAICS 622310) and primary care services (NAICS 621111). Table S3 provides the detailed selection criteria for health care facilities. We further applied the DBSCAN clustering approach (Campello et al., 2013; Hahsler et al., 2019) on the primary care and emergency care facilities as they are mostly spatially clustered within our study areas. We chose an epsilon value of 400 meters (approximately 5 minutes walking distance) and a minimum

clustering threshold of 3 points. This means that a group of 3 or more facilities form a cluster (and counted as one location in our analysis) if each facility is located at most 400m away from its neighbors.

**Table S3 | Selection Criteria for health care facilities**

| Type                          | Facilities included                                                    | NAICS  | Examples of facilities                                                                                                                                           |
|-------------------------------|------------------------------------------------------------------------|--------|------------------------------------------------------------------------------------------------------------------------------------------------------------------|
| <b>Urgent health care</b>     | General hospitals                                                      | 622110 | General medical, surgical, and children’s hospital                                                                                                               |
|                               | Emergency care services                                                | 621493 | Ambulatory services, trauma centers, urgent medical care                                                                                                         |
| <b>Non-urgent health care</b> | Specialty hospitals (except psychiatric and substance abuse hospitals) | 622310 | Medical and diagnostic services, chronic disease hospitals, maternity hospitals, neurological services, children’s hospital, eye, ear, nose, and throat hospital |
|                               | Primary care physicians                                                | 621111 | Offices of physicians for independent practices, family physicians’ offices, and health screening services                                                       |

### 3 Measuring transit-based access using average isochrones

We generated travel time isochrones to measure accessibility. Isochrones delimit the area reachable from a specific point location given a travel time threshold or other cost parameters and a specific mode of travel. In this study, we generated isochrones using the spatial coverage of transit services (e.g., stop locations and available routes) and travel time as a cost function. We chose travel time thresholds of 30 and 45 minutes, as those are consistent with other accessibility studies and most commute trips are around 30 minutes one way (FRED Economic Data, 2019; Kelobonye et al., 2019; US Census Bureau, 2017).

We considered four criteria for measuring accessibility: destination type (food, urgent, and non-urgent health care), travel time threshold (30 minutes or 45 minutes), transit operation time (peak or off-peak), and pandemic response phase (pre-lockdown, lockdown, and post-lockdown). In addition, we used 9 AM – 10 AM to represent the peak hours and 1 PM – 2 PM to represent the off-peak hours, and sampled isochrones for both hours using 10-minute intervals. We delineated isochrones around each point location using Open Trip Planner on OpenStreetMap and GTFS data as the network inputs (GTFS, 2020; OpenStreetMap, 2020; OpenTripPlanner, 2021) and aggregated them to generate the sample isochrone layers for each combination of accessibility measurement criteria.

Based on the above approach, we generated travel time isochrones to identify the block groups that still had access to food and health care by transit. For each destination and travel time threshold, we had 6 sampled isochrones for each hour (peak or off-peak) in each study area (in the vector format). To average these sampled isochrones, we converted each isochrone layer into a raster format with a 10-meter grid resolution and assigned each cell a value of 1 if it was within the isochrone boundary and 0 otherwise. Then, we overlaid the raster layers and normalized their aggregated values to estimate the probability of a grid cell being within the isochrone. Finally, we used a median threshold value of 0.5 to identify the grid cells that define the average isochrone boundary. We performed this procedure using Python and published the code in a Github public repository. An online map of accessibility changes is available at: <https://arcg.is/05qP5z>.

#### 4 Description of socio-economic variables

We extracted socio-economic information at a census block group level from American Community Survey (ACS) 5-year estimates (2014-2018) and the Environmental Protection Agency (EPA) Smart Location Database (Ramsey and Bell, 2014; US Census Bureau, 2020). Table S4 provides a list of socio-economic variables used in this study.

**Table S4 | Socio-economic variables at the block group level**

| Variable name                    | Description                                                                                                                    | Unit       | Data Source                    |
|----------------------------------|--------------------------------------------------------------------------------------------------------------------------------|------------|--------------------------------|
| <b>Poverty rate</b>              | Percentage of households living below the poverty level (determined by householder's age, family size, and number of children) | Percentage | ACS 5-year estimates 2014-2018 |
| <b>Black or African American</b> | Percentage of Black or African American populations                                                                            | Percentage |                                |
| <b>Other races</b>               | Percentage of people who are not non-Hispanic White or Black                                                                   | Percentage |                                |
| <b>No-vehicle households</b>     | Percentage of households with no car ownership                                                                                 | Percentage |                                |
| <b>Low-income workers</b>        | Percentage of workers with income below \$1,250 per month                                                                      | Percentage | EPA Smart Location Database    |

We examined the Pearson correlation coefficients among the socio-economic variables to ensure that the models were not affected by multicollinearity. As shown in Fig. S1, the absolute correlation coefficient values between all model variables are below 0.5, which confirms that no strong correlation effects among the model parameters were present.

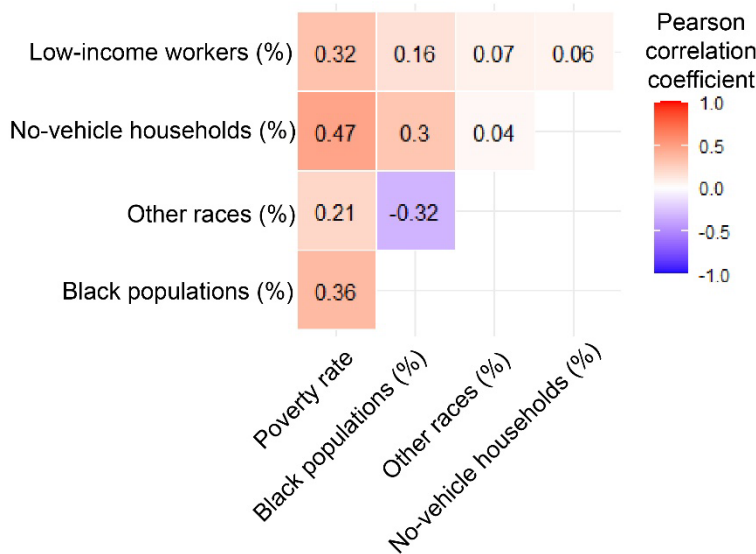

**Fig. S2 | Pearson correlation coefficients for the socio-economic variables.** The cells colored in red shades represent positive correlation and the cells colored in purple shades represent negative correlation between the respective variables on the x and y axis.

## 5 Descriptive statistics

**Table S5 | Descriptive statistics for changes in transit-based access to food during peak hours using a 30-minute total travel time threshold.**

|                                     |        | Block groups with no access |               | Block groups with access |               |
|-------------------------------------|--------|-----------------------------|---------------|--------------------------|---------------|
|                                     |        | Lockdown                    | Post-lockdown | Lockdown                 | Post-lockdown |
| Poverty rate                        | Mean   | 12.91                       | 13.10         | 16.50                    | 16.50         |
|                                     | Median | 8.82                        | 9.00          | 12.95                    | 12.94         |
|                                     | Std.   | 12.83                       | 13.13         | 14.01                    | 14.00         |
| Percentage of black populations     | Mean   | 15.94                       | 14.66         | 17.88                    | 17.98         |
|                                     | Median | 4.86                        | 3.87          | 4.84                     | 4.93          |
|                                     | Std.   | 24.35                       | 23.55         | 27.08                    | 27.13         |
| Percentage of other races           | Mean   | 34.36                       | 39.67         | 41.59                    | 41.02         |
|                                     | Median | 26.05                       | 32.68         | 35.67                    | 34.80         |
|                                     | Std.   | 27.65                       | 28.60         | 28.86                    | 28.84         |
| Percentage of no-vehicle households | Mean   | 8.93                        | 8.72          | 22.56                    | 22.56         |
|                                     | Median | 4.48                        | 4.61          | 12.89                    | 12.85         |
|                                     | Std.   | 12.60                       | 11.96         | 24.21                    | 24.24         |
| Percentage of low-income workers    | Mean   | 0.24                        | 0.25          | 0.24                     | 0.24          |
|                                     | Median | 0.23                        | 0.24          | 0.24                     | 0.24          |
|                                     | Std.   | 0.08                        | 0.08          | 0.08                     | 0.08          |
| Total area                          | Sum    | 1.54E+09                    | 1.24E+09      | 1.14E+10                 | 1.18E+10      |

**Table S6 | Descriptive statistics for the in transit-based access to non-urgent healthcare during peak hours using a 30-minute total travel time threshold.**

|                                     |        | Block groups with no access |               | Block groups with access |               |
|-------------------------------------|--------|-----------------------------|---------------|--------------------------|---------------|
|                                     |        | Lockdown                    | Post-lockdown | Lockdown n               | Post-lockdown |
| Poverty rate                        | Mean   | 12.47                       | 10.64         | 15.96                    | 16.08         |
|                                     | Median | 7.84                        | 6.93          | 12.35                    | 12.45         |
|                                     | Std.   | 13.65                       | 11.41         | 13.88                    | 13.96         |
| Percentage of black populations     | Mean   | 19.46                       | 15.04         | 17.59                    | 17.85         |
|                                     | Median | 4.60                        | 3.47          | 4.73                     | 4.79          |
|                                     | Std.   | 29.76                       | 25.93         | 26.83                    | 27.05         |
| Percentage of other races           | Mean   | 24.86                       | 30.89         | 40.61                    | 40.09         |
|                                     | Median | 19.44                       | 24.45         | 34.13                    | 33.49         |
|                                     | Std.   | 21.70                       | 25.30         | 28.86                    | 28.74         |
| Percentage of no-vehicle households | Mean   | 10.06                       | 6.22          | 20.49                    | 20.86         |
|                                     | Median | 4.12                        | 3.07          | 10.89                    | 11.28         |
|                                     | Std.   | 14.83                       | 9.17          | 23.37                    | 23.50         |
| Percentage of low-income workers    | Mean   | 0.23                        | 0.23          | 0.24                     | 0.24          |
|                                     | Median | 0.23                        | 0.22          | 0.24                     | 0.24          |
|                                     | Std.   | 0.07                        | 0.08          | 0.08                     | 0.08          |
| Total area                          | Sum    | 8.52E+08                    | 1.00E+09      | 1.63E+10                 | 1.59E+10      |

**Table S7 | Descriptive statistics for changes in transit-based access to urgent healthcare during peak hours using a 30-minute total travel time threshold.**

|                                 |        | Block groups with no access |               | Block groups with access |               |
|---------------------------------|--------|-----------------------------|---------------|--------------------------|---------------|
|                                 |        | Lockdown                    | Post-lockdown | Lockdown                 | Post-lockdown |
| Poverty rate                    | Mean   | 10.38                       | 8.82          | 16.19                    | 16.24         |
|                                 | Median | 6.91                        | 5.95          | 12.59                    | 12.64         |
|                                 | Std.   | 11.42                       | 9.77          | 13.99                    | 14.00         |
| Percentage of black populations | Mean   | 16.70                       | 12.27         | 17.83                    | 18.06         |
|                                 | Median | 3.19                        | 2.53          | 4.84                     | 4.90          |
|                                 | Std.   | 28.02                       | 23.25         | 26.99                    | 27.20         |
| Percentage of other races       | Mean   | 25.12                       | 30.19         | 40.87                    | 40.53         |

|                                     |        | Block groups with no access |               | Block groups with access |               |
|-------------------------------------|--------|-----------------------------|---------------|--------------------------|---------------|
|                                     |        | Lockdown                    | Post-lockdown | Lockdown                 | Post-lockdown |
|                                     | Median | 18.65                       | 23.99         | 34.56                    | 34.09         |
|                                     | Std.   | 22.18                       | 24.29         | 28.86                    | 28.87         |
|                                     | Mean   | 6.25                        | 5.20          | 21.00                    | 21.01         |
| Percentage of no-vehicle households | Median | 2.92                        | 2.66          | 11.42                    | 11.45         |
|                                     | Std.   | 9.07                        | 7.03          | 23.54                    | 23.52         |
|                                     | Mean   | 0.23                        | 0.23          | 0.24                     | 0.24          |
| Percentage of low-income workers    | Median | 0.22                        | 0.22          | 0.24                     | 0.24          |
|                                     | Std.   | 0.06                        | 0.08          | 0.08                     | 0.08          |
|                                     | Mean   | 0.22                        | 0.22          | 0.24                     | 0.24          |
| Total area                          | Sum    | 1.08E+09                    | 9.29E+08      | 1.52E+10                 | 1.53E+10      |

## 6 Kruskal-Wallis tests for comparing the changes in transit access by socio-economic groups: Accessibility with 30-minute travel time

Table S8 | Kruskal-Wallis test results for changes in transit-based access to food and healthcare during peak and off-peak hours using a 30-minute total travel time threshold.

|                         | Grocery   |                |           |                | Health non-urgent |                |           |                | Health urgent |                |           |                |
|-------------------------|-----------|----------------|-----------|----------------|-------------------|----------------|-----------|----------------|---------------|----------------|-----------|----------------|
|                         | Peak      |                | Off-peak  |                | Peak              |                | Off-peak  |                | Peak          |                | Off-peak  |                |
|                         | Lock-down | Post-lock down | Lock-down | Post-lock down | Lock-down         | Post-lock down | Lock-down | Post-lock down | Lock-down     | Post-lock down | Lock-down | Post-lock down |
| <b>Ann Arbor</b>        |           |                |           |                |                   |                |           |                |               |                |           |                |
| Number of observations  | 141       | 141            | 142       | 144            | 156               | 161            | 156       | 169            | 127           | 139            | 127       | 137            |
| Variables               | p-value   |                |           |                |                   |                |           |                |               |                |           |                |
| Poverty rate            | 0.278     | 0.015          | 0.224     | 0.002          | 0.010             | 0.036          | 0.004     | 0.101          | 0.068         | 0.000          | 0.036     | 0.008          |
| Black population (%)    | 0.014     | 0.973          | 0.022     | 0.951          | 0.959             | 0.956          | 0.712     | 0.207          | 0.873         | 0.647          | 0.909     | 0.479          |
| Other races (%)         | 0.066     | 0.477          | 0.058     | 0.514          | 0.301             | 0.304          | 0.603     | 0.550          | 0.612         | 0.736          | 0.483     | 0.852          |
| Owner of no vehicle (%) | 0.001     | 0.000          | 0.001     | 0.000          | 0.049             | 0.103          | 0.060     | 0.074          | 0.207         | 0.002          | 0.067     | 0.047          |
| Low-income workers (%)  | 0.094     | 0.000          | 0.097     | 0.000          | 0.016             | 0.001          | 0.010     | 0.001          | 0.014         | 0.001          | 0.011     | 0.028          |
| <b>Atlanta</b>          |           |                |           |                |                   |                |           |                |               |                |           |                |
| Number of observations  | 581       | 611            | 593       | 614            | 814               | 801            | 801       | 786            | 771           | 796            | 762       | 798            |
| Variables               | p-value   |                |           |                |                   |                |           |                |               |                |           |                |
| Poverty rate            | 0.327     | 0.038          | 0.636     | 0.069          | 0.000             | 0.001          | 0.000     | 0.034          | 0.013         | 0.000          | 0.006     | 0.006          |
| Black population (%)    | 0.001     | 0.014          | 0.019     | 0.004          | 0.001             | 0.073          | 0.020     | 0.016          | 0.001         | 0.250          | 0.002     | 0.219          |
| Other races (%)         | 0.185     | 0.431          | 0.870     | 0.383          | 0.019             | 0.111          | 0.109     | 0.472          | 0.411         | 0.406          | 0.181     | 0.153          |
| Owner of no vehicle (%) | 0.127     | 0.010          | 0.105     | 0.012          | 0.000             | 0.000          | 0.000     | 0.000          | 0.000         | 0.000          | 0.000     | 0.000          |
| Low-income workers (%)  | 0.001     | 0.025          | 0.004     | 0.004          | 0.000             | 0.001          | 0.000     | 0.001          | 0.001         | 0.000          | 0.001     | 0.000          |
| <b>Austin</b>           |           |                |           |                |                   |                |           |                |               |                |           |                |
| Number of observations  | 367       | 353            | 364       | 354            | 457               | 449            | 457       | 461            | 432           | 435            | 430       | 434            |
| Variables               | p-value   |                |           |                |                   |                |           |                |               |                |           |                |
| Poverty rate            | 0.000     | 0.000          | 0.000     | 0.000          | 0.000             | 0.000          | 0.000     | 0.000          | 0.000         | 0.000          | 0.000     | 0.000          |
| Black population (%)    | 0.431     | 0.272          | 0.458     | 0.324          | 0.810             | 0.931          | 0.972     | 0.568          | 0.604         | 0.208          | 0.478     | 0.276          |
| Other races (%)         | 0.845     | 0.495          | 0.819     | 0.390          | 0.820             | 0.853          | 0.845     | 0.757          | 0.816         | 0.859          | 0.973     | 0.994          |
| Owner of no vehicle (%) | 0.000     | 0.000          | 0.000     | 0.000          | 0.000             | 0.000          | 0.000     | 0.000          | 0.000         | 0.000          | 0.000     | 0.000          |
| Low-income workers (%)  | 0.000     | 0.000          | 0.000     | 0.000          | 0.000             | 0.000          | 0.000     | 0.000          | 0.000         | 0.000          | 0.000     | 0.000          |
| <b>Boston</b>           |           |                |           |                |                   |                |           |                |               |                |           |                |



|                          | Grocery   |                |           |                | Health non-urgent |                |           |                | Health urgent |                |           |                |
|--------------------------|-----------|----------------|-----------|----------------|-------------------|----------------|-----------|----------------|---------------|----------------|-----------|----------------|
|                          | Peak      |                | Off-peak  |                | Peak              |                | Off-peak  |                | Peak          |                | Off-peak  |                |
|                          | Lock-down | Post-lock down | Lock-down | Post-lock down | Lock-down         | Post-lock down | Lock-down | Post-lock down | Lock-down     | Post-lock down | Lock-down | Post-lock down |
| Number of observations   | 1522      | 1488           | 1503      | 1496           | 1735              | 1714           | 1715      | 1699           | 1691          | 1653           | 1688      | 1625           |
| Variables                | p-value   |                |           |                |                   |                |           |                |               |                |           |                |
| Poverty rate             | 0.000     | 0.000          | 0.000     | 0.000          | 0.000             | 0.000          | 0.000     | 0.000          | 0.000         | 0.000          | 0.000     | 0.000          |
| Black population (%)     | 0.000     | 0.000          | 0.000     | 0.000          | 0.000             | 0.000          | 0.000     | 0.000          | 0.000         | 0.000          | 0.000     | 0.000          |
| Other races (%)          | 0.000     | 0.000          | 0.000     | 0.000          | 0.000             | 0.000          | 0.000     | 0.000          | 0.000         | 0.000          | 0.000     | 0.000          |
| Owner of no vehicle (%)  | 0.000     | 0.000          | 0.000     | 0.000          | 0.000             | 0.000          | 0.000     | 0.000          | 0.000         | 0.000          | 0.000     | 0.000          |
| Low-income workers (%)   | 0.018     | 0.008          | 0.005     | 0.001          | 0.001             | 0.000          | 0.003     | 0.003          | 0.001         | 0.001          | 0.020     | 0.004          |
| <b>Urbana- Champaign</b> |           |                |           |                |                   |                |           |                |               |                |           |                |
| Number of observations   | 72        | 77             | 72        | 77             | 92                | 93             | 92        | 92             | 89            | 90             | 89        | 90             |
| Variables                | p-value   |                |           |                |                   |                |           |                |               |                |           |                |
| Poverty rate             | 0.439     | 0.009          | 0.420     | 0.013          | 0.126             | 0.002          | 0.107     | 0.001          | 0.522         | 0.065          | 0.577     | 0.074          |
| Black population (%)     | 0.407     | 0.043          | 0.454     | 0.033          | 0.350             | 0.778          | 0.320     | 0.751          | 0.563         | 0.117          | 0.436     | 0.061          |
| Other races (%)          | 0.027     | 0.018          | 0.024     | 0.028          | 0.832             | 0.399          | 0.794     | 0.545          | 0.890         | 0.376          | 0.904     | 0.280          |
| Owner of no vehicle (%)  | 0.268     | 0.119          | 0.318     | 0.147          | 0.123             | 0.050          | 0.122     | 0.018          | 0.430         | 0.357          | 0.756     | 0.272          |
| Low-income workers (%)   | 0.757     | 0.828          | 0.680     | 0.867          | 0.085             | 0.063          | 0.091     | 0.097          | 0.090         | 0.684          | 0.114     | 0.611          |
| <b>Chicago</b>           |           |                |           |                |                   |                |           |                |               |                |           |                |
| Number of observations   | 2458      | 2434           | 2456      | 2435           | 2572              | 2570           | 2573      | 2571           | 2557          | 2556           | 2558      | 2558           |
| Variables                | p-value   |                |           |                |                   |                |           |                |               |                |           |                |
| Poverty rate             | 0.005     | 0.005          | 0.024     | 0.001          | 0.003             | 0.000          | 0.000     | 0.000          | 0.000         | 0.000          | 0.000     | 0.000          |
| Black population (%)     | 0.066     | 0.021          | 0.007     | 0.073          | 0.000             | 0.000          | 0.000     | 0.000          | 0.000         | 0.000          | 0.000     | 0.000          |
| Other races (%)          | 0.010     | 0.056          | 0.259     | 0.037          | 0.004             | 0.001          | 0.009     | 0.000          | 0.012         | 0.000          | 0.003     | 0.000          |
| Owner of no vehicle (%)  | 0.000     | 0.000          | 0.000     | 0.000          | 0.000             | 0.000          | 0.000     | 0.000          | 0.000         | 0.000          | 0.000     | 0.000          |
| Low-income workers (%)   | 0.000     | 0.000          | 0.000     | 0.000          | 0.000             | 0.000          | 0.004     | 0.000          | 0.003         | 0.001          | 0.001     | 0.002          |
| <b>Columbus</b>          |           |                |           |                |                   |                |           |                |               |                |           |                |
| Number of observations   | 533       | 555            | 539       | 553            | 700               | 698            | 701       | 702            | 650           | 655            | 641       | 667            |
| Variables                | p-value   |                |           |                |                   |                |           |                |               |                |           |                |
| Poverty rate             | 0.000     | 0.000          | 0.000     | 0.000          | 0.000             | 0.000          | 0.000     | 0.000          | 0.000         | 0.000          | 0.000     | 0.000          |
| Black population (%)     | 0.029     | 0.043          | 0.042     | 0.184          | 0.118             | 0.024          | 0.010     | 0.074          | 0.287         | 0.193          | 0.180     | 0.008          |
| Other races (%)          | 0.493     | 0.785          | 0.577     | 0.749          | 0.908             | 0.956          | 0.872     | 0.984          | 0.684         | 0.907          | 0.994     | 0.961          |
| Owner of no vehicle (%)  | 0.001     | 0.000          | 0.002     | 0.000          | 0.000             | 0.000          | 0.000     | 0.000          | 0.000         | 0.000          | 0.000     | 0.000          |
| Low-income workers (%)   | 0.000     | 0.000          | 0.000     | 0.000          | 0.000             | 0.000          | 0.000     | 0.000          | 0.000         | 0.000          | 0.000     | 0.000          |
| <b>Dallas</b>            |           |                |           |                |                   |                |           |                |               |                |           |                |
| Number of observations   | 1287      | 1316           | 1273      | 1301           | 1443              | 1425           | 1459      | 1448           | 1409          | 1397           | 1395      | 1369           |
| Variables                | p-value   |                |           |                |                   |                |           |                |               |                |           |                |
| Poverty rate             | 0.000     | 0.000          | 0.000     | 0.000          | 0.000             | 0.000          | 0.000     | 0.000          | 0.000         | 0.000          | 0.000     | 0.000          |
| Black population (%)     | 0.902     | 0.727          | 0.934     | 0.986          | 0.440             | 0.037          | 0.318     | 0.510          | 0.894         | 0.855          | 0.657     | 0.954          |
| Other races (%)          | 0.000     | 0.000          | 0.001     | 0.000          | 0.000             | 0.000          | 0.000     | 0.000          | 0.000         | 0.000          | 0.000     | 0.000          |
| Owner of no vehicle (%)  | 0.000     | 0.000          | 0.000     | 0.000          | 0.000             | 0.000          | 0.000     | 0.000          | 0.000         | 0.000          | 0.000     | 0.000          |
| Low-income workers (%)   | 0.000     | 0.000          | 0.000     | 0.000          | 0.000             | 0.000          | 0.000     | 0.000          | 0.000         | 0.000          | 0.000     | 0.000          |
| <b>Denver</b>            |           |                |           |                |                   |                |           |                |               |                |           |                |

|                         | Grocery   |                |           |                | Health non-urgent |                |           |                | Health urgent |                |           |                |
|-------------------------|-----------|----------------|-----------|----------------|-------------------|----------------|-----------|----------------|---------------|----------------|-----------|----------------|
|                         | Peak      |                | Off-peak  |                | Peak              |                | Off-peak  |                | Peak          |                | Off-peak  |                |
|                         | Lock-down | Post-lock down | Lock-down | Post-lock down | Lock-down         | Post-lock down | Lock-down | Post-lock down | Lock-down     | Post-lock down | Lock-down | Post-lock down |
| Number of observations  | 1247      | 1171           | 1215      | 1176           | 1548              | 1564           | 1546      | 1558           | 1514          | 1523           | 1513      | 1529           |
| Variables               | p-value   |                |           |                |                   |                |           |                |               |                |           |                |
| Poverty rate            | 0.000     | 0.000          | 0.000     | 0.000          | 0.000             | 0.000          | 0.000     | 0.000          | 0.000         | 0.000          | 0.000     | 0.000          |
| Black population (%)    | 0.000     | 0.000          | 0.000     | 0.000          | 0.000             | 0.000          | 0.000     | 0.000          | 0.000         | 0.000          | 0.000     | 0.000          |
| Other races (%)         | 0.000     | 0.516          | 0.001     | 0.360          | 0.000             | 0.000          | 0.000     | 0.000          | 0.000         | 0.000          | 0.000     | 0.000          |
| Owner of no vehicle (%) | 0.000     | 0.000          | 0.000     | 0.000          | 0.000             | 0.000          | 0.000     | 0.000          | 0.000         | 0.000          | 0.000     | 0.000          |
| Low-income workers (%)  | 0.000     | 0.000          | 0.000     | 0.000          | 0.000             | 0.000          | 0.000     | 0.000          | 0.000         | 0.000          | 0.000     | 0.000          |
| <b>Los Angeles</b>      |           |                |           |                |                   |                |           |                |               |                |           |                |
| Number of observations  | 4200      | 4107           | 4192      | 4069           | 4816              | 4401           | 4818      | 4329           | 4685          | 4617           | 4668      | 4487           |
| Variables               | p-value   |                |           |                |                   |                |           |                |               |                |           |                |
| Poverty rate            | 0.000     | 0.000          | 0.000     | 0.000          | 0.000             | 0.000          | 0.000     | 0.000          | 0.000         | 0.000          | 0.000     | 0.000          |
| Black population (%)    | 0.000     | 0.001          | 0.000     | 0.003          | 0.000             | 0.000          | 0.000     | 0.000          | 0.000         | 0.000          | 0.000     | 0.000          |
| Other races (%)         | 0.001     | 0.112          | 0.004     | 0.162          | 0.000             | 0.001          | 0.000     | 0.001          | 0.000         | 0.000          | 0.000     | 0.000          |
| Owner of no vehicle (%) | 0.000     | 0.000          | 0.000     | 0.000          | 0.000             | 0.000          | 0.000     | 0.000          | 0.000         | 0.000          | 0.000     | 0.000          |
| Low-income workers (%)  | 0.000     | 0.000          | 0.000     | 0.000          | 0.000             | 0.000          | 0.000     | 0.000          | 0.000         | 0.000          | 0.000     | 0.000          |
| <b>Louisville</b>       |           |                |           |                |                   |                |           |                |               |                |           |                |
| Number of observations  | 288       | 277            | 284       | 279            | 428               | 425            | 428       | 429            | 371           | 391            | 370       | 392            |
| Variables               | p-value   |                |           |                |                   |                |           |                |               |                |           |                |
| Poverty rate            | 0.596     | 0.008          | 0.447     | 0.002          | 0.000             | 0.000          | 0.000     | 0.000          | 0.000         | 0.000          | 0.000     | 0.000          |
| Black population (%)    | 0.107     | 0.597          | 0.251     | 0.529          | 0.000             | 0.000          | 0.000     | 0.000          | 0.001         | 0.000          | 0.007     | 0.000          |
| Other races (%)         | 0.535     | 0.096          | 0.540     | 0.205          | 0.285             | 0.139          | 0.096     | 0.144          | 0.487         | 0.195          | 0.429     | 0.322          |
| Owner of no vehicle (%) | 0.800     | 0.019          | 0.601     | 0.046          | 0.000             | 0.000          | 0.000     | 0.000          | 0.000         | 0.000          | 0.000     | 0.000          |
| Low-income workers (%)  | 0.394     | 0.178          | 0.432     | 0.416          | 0.000             | 0.000          | 0.000     | 0.000          | 0.000         | 0.000          | 0.000     | 0.000          |
| <b>Madison</b>          |           |                |           |                |                   |                |           |                |               |                |           |                |
| Number of observations  | 151       | 155            | 156       | 155            | 168               | 172            | 172       | 176            | 155           | 160            | 160       | 160            |
| Variables               | p-value   |                |           |                |                   |                |           |                |               |                |           |                |
| Poverty rate            | 0.000     | 0.000          | 0.002     | 0.000          | 0.005             | 0.000          | 0.014     | 0.001          | 0.001         | 0.003          | 0.001     | 0.002          |
| Black population (%)    | 0.405     | 0.914          | 0.063     | 0.781          | 0.428             | 0.812          | 0.234     | 0.648          | 0.493         | 0.213          | 0.630     | 0.091          |
| Other races (%)         | 0.042     | 0.574          | 0.057     | 0.518          | 0.136             | 0.224          | 0.047     | 0.127          | 0.920         | 0.756          | 0.745     | 0.173          |
| Owner of no vehicle (%) | 0.000     | 0.000          | 0.000     | 0.000          | 0.001             | 0.008          | 0.008     | 0.024          | 0.004         | 0.003          | 0.002     | 0.002          |
| Low-income workers (%)  | 0.002     | 0.000          | 0.001     | 0.000          | 0.001             | 0.001          | 0.000     | 0.002          | 0.000         | 0.001          | 0.000     | 0.001          |
| <b>Miami</b>            |           |                |           |                |                   |                |           |                |               |                |           |                |
| Number of observations  | 1340      | 1358           | 1318      | 1351           | 1468              | 1439           | 1486      | 1447           | 1462          | 1428           | 1441      | 1414           |
| Variables               | p-value   |                |           |                |                   |                |           |                |               |                |           |                |
| Poverty rate            | 0.000     | 0.000          | 0.000     | 0.000          | 0.000             | 0.000          | 0.000     | 0.000          | 0.000         | 0.000          | 0.000     | 0.000          |
| Black population (%)    | 0.756     | 0.653          | 0.468     | 0.950          | 0.283             | 0.003          | 0.025     | 0.011          | 0.025         | 0.240          | 0.001     | 0.033          |
| Other races (%)         | 0.391     | 0.001          | 0.167     | 0.003          | 0.000             | 0.003          | 0.000     | 0.003          | 0.000         | 0.000          | 0.000     | 0.000          |
| Owner of no vehicle (%) | 0.000     | 0.000          | 0.000     | 0.000          | 0.000             | 0.000          | 0.000     | 0.000          | 0.000         | 0.000          | 0.000     | 0.000          |
| Low-income workers (%)  | 0.000     | 0.000          | 0.000     | 0.000          | 0.000             | 0.000          | 0.000     | 0.000          | 0.000         | 0.000          | 0.000     | 0.000          |
| <b>Nashville</b>        |           |                |           |                |                   |                |           |                |               |                |           |                |

|                         | Grocery   |                |           |                | Health non-urgent |                |           |                | Health urgent |                |           |                |
|-------------------------|-----------|----------------|-----------|----------------|-------------------|----------------|-----------|----------------|---------------|----------------|-----------|----------------|
|                         | Peak      |                | Off-peak  |                | Peak              |                | Off-peak  |                | Peak          |                | Off-peak  |                |
|                         | Lock-down | Post-lock down | Lock-down | Post-lock down | Lock-down         | Post-lock down | Lock-down | Post-lock down | Lock-down     | Post-lock down | Lock-down | Post-lock down |
| Number of observations  | 207       | 219            | 209       | 217            | 327               | 334            | 327       | 332            | 307           | 311            | 307       | 308            |
| Variables               | p-value   |                |           |                |                   |                |           |                |               |                |           |                |
| Poverty rate            | 0.068     | 0.035          | 0.066     | 0.039          | 0.000             | 0.000          | 0.001     | 0.000          | 0.000         | 0.000          | 0.000     | 0.000          |
| Black population (%)    | 0.238     | 0.561          | 0.257     | 0.519          | 0.464             | 0.044          | 0.615     | 0.069          | 0.089         | 0.133          | 0.108     | 0.279          |
| Other races (%)         | 0.520     | 0.607          | 0.694     | 0.610          | 0.209             | 0.055          | 0.233     | 0.076          | 0.214         | 0.267          | 0.237     | 0.154          |
| Owner of no vehicle (%) | 0.004     | 0.013          | 0.006     | 0.023          | 0.000             | 0.000          | 0.000     | 0.000          | 0.004         | 0.002          | 0.003     | 0.010          |
| Low-income workers (%)  | 0.021     | 0.008          | 0.018     | 0.029          | 0.000             | 0.000          | 0.000     | 0.000          | 0.000         | 0.000          | 0.000     | 0.000          |
| <b>New York City</b>    |           |                |           |                |                   |                |           |                |               |                |           |                |
| Number of observations  | 5993      | 5970           | 5925      | 5906           | 6348              | 6355           | 6348      | 6349           | 6330          | 6332           | 6327      | 6330           |
| Variables               | p-value   |                |           |                |                   |                |           |                |               |                |           |                |
| Poverty rate            | 0.000     | 0.000          | 0.000     | 0.000          | 0.000             | 0.000          | 0.000     | 0.000          | 0.000         | 0.000          | 0.000     | 0.000          |
| Black population (%)    | 0.000     | 0.000          | 0.000     | 0.000          | 0.014             | 0.027          | 0.001     | 0.005          | 0.000         | 0.011          | 0.000     | 0.004          |
| Other races (%)         | 0.000     | 0.000          | 0.000     | 0.001          | 0.000             | 0.000          | 0.000     | 0.000          | 0.000         | 0.000          | 0.000     | 0.000          |
| Owner of no vehicle (%) | 0.000     | 0.000          | 0.000     | 0.000          | 0.000             | 0.000          | 0.000     | 0.000          | 0.000         | 0.000          | 0.000     | 0.000          |
| Low-income workers (%)  | 0.000     | 0.000          | 0.000     | 0.000          | 0.000             | 0.000          | 0.000     | 0.000          | 0.000         | 0.000          | 0.000     | 0.000          |
| <b>Philadelphia</b>     |           |                |           |                |                   |                |           |                |               |                |           |                |
| Number of observations  | 2027      | 2068           | 2040      | 2094           | 2244              | 2251           | 2258      | 2278           | 2196          | 2233           | 2201      | 2217           |
| Variables               | p-value   |                |           |                |                   |                |           |                |               |                |           |                |
| Poverty rate            | 0.000     | 0.000          | 0.000     | 0.000          | 0.000             | 0.000          | 0.000     | 0.000          | 0.000         | 0.000          | 0.000     | 0.000          |
| Black population (%)    | 0.000     | 0.000          | 0.000     | 0.000          | 0.000             | 0.000          | 0.000     | 0.000          | 0.000         | 0.000          | 0.000     | 0.000          |
| Other races (%)         | 0.000     | 0.000          | 0.000     | 0.000          | 0.000             | 0.000          | 0.000     | 0.000          | 0.000         | 0.000          | 0.000     | 0.000          |
| Owner of no vehicle (%) | 0.000     | 0.000          | 0.000     | 0.000          | 0.000             | 0.000          | 0.000     | 0.000          | 0.000         | 0.000          | 0.000     | 0.000          |
| Low-income workers (%)  | 0.000     | 0.000          | 0.000     | 0.000          | 0.000             | 0.000          | 0.000     | 0.000          | 0.000         | 0.000          | 0.000     | 0.000          |
| <b>Phoenix</b>          |           |                |           |                |                   |                |           |                |               |                |           |                |
| Number of observations  | 1651      | 1646           | 1652      | 1641           | 1806              | 1789           | 1811      | 1784           | 1755          | 1758           | 1765      | 1772           |
| Variables               | p-value   |                |           |                |                   |                |           |                |               |                |           |                |
| Poverty rate            | 0.000     | 0.000          | 0.000     | 0.000          | 0.000             | 0.000          | 0.000     | 0.000          | 0.000         | 0.000          | 0.000     | 0.000          |
| Black population (%)    | 0.032     | 0.005          | 0.006     | 0.085          | 0.000             | 0.000          | 0.000     | 0.000          | 0.000         | 0.000          | 0.000     | 0.000          |
| Other races (%)         | 0.000     | 0.000          | 0.000     | 0.000          | 0.000             | 0.000          | 0.000     | 0.000          | 0.000         | 0.000          | 0.000     | 0.000          |
| Owner of no vehicle (%) | 0.000     | 0.000          | 0.000     | 0.000          | 0.000             | 0.000          | 0.000     | 0.000          | 0.000         | 0.000          | 0.000     | 0.000          |
| Low-income workers (%)  | 0.000     | 0.000          | 0.000     | 0.000          | 0.000             | 0.000          | 0.000     | 0.000          | 0.000         | 0.000          | 0.000     | 0.000          |
| <b>Portland</b>         |           |                |           |                |                   |                |           |                |               |                |           |                |
| Number of observations  | 776       | 775            | 773       | 769            | 814               | 830            | 820       | 821            | 825           | 823            | 826       | 828            |
| Variables               | p-value   |                |           |                |                   |                |           |                |               |                |           |                |
| Poverty rate            | 0.000     | 0.000          | 0.000     | 0.000          | 0.000             | 0.000          | 0.000     | 0.000          | 0.000         | 0.000          | 0.000     | 0.000          |
| Black population (%)    | 0.008     | 0.006          | 0.003     | 0.003          | 0.000             | 0.000          | 0.000     | 0.000          | 0.000         | 0.000          | 0.000     | 0.000          |
| Other races (%)         | 0.760     | 0.688          | 0.570     | 0.198          | 0.293             | 0.649          | 0.414     | 0.287          | 0.291         | 0.279          | 0.250     | 0.175          |
| Owner of no vehicle (%) | 0.000     | 0.000          | 0.000     | 0.000          | 0.000             | 0.000          | 0.000     | 0.000          | 0.000         | 0.000          | 0.000     | 0.000          |
| Low-income workers (%)  | 0.000     | 0.000          | 0.000     | 0.000          | 0.000             | 0.000          | 0.000     | 0.000          | 0.000         | 0.000          | 0.000     | 0.000          |
| <b>San Jose</b>         |           |                |           |                |                   |                |           |                |               |                |           |                |

|                         | Grocery   |                |           |                | Health non-urgent |                |           |                | Health urgent |                |           |                |
|-------------------------|-----------|----------------|-----------|----------------|-------------------|----------------|-----------|----------------|---------------|----------------|-----------|----------------|
|                         | Peak      |                | Off-peak  |                | Peak              |                | Off-peak  |                | Peak          |                | Off-peak  |                |
|                         | Lock-down | Post-lock down | Lock-down | Post-lock down | Lock-down         | Post-lock down | Lock-down | Post-lock down | Lock-down     | Post-lock down | Lock-down | Post-lock down |
| Number of observations  | 851       | 841            | 840       | 843            | 955               | 968            | 970       | 974            | 915           | 923            | 915       | 934            |
| Variables               | p-value   |                |           |                |                   |                |           |                |               |                |           |                |
| Poverty rate            | 0.000     | 0.017          | 0.001     | 0.009          | 0.000             | 0.000          | 0.000     | 0.000          | 0.000         | 0.000          | 0.000     | 0.000          |
| Black population (%)    | 0.527     | 0.312          | 0.487     | 0.381          | 0.392             | 0.174          | 0.371     | 0.463          | 0.026         | 0.119          | 0.007     | 0.081          |
| Other races (%)         | 0.081     | 0.009          | 0.018     | 0.000          | 0.008             | 0.013          | 0.023     | 0.040          | 0.392         | 0.108          | 0.501     | 0.246          |
| Owner of no vehicle (%) | 0.002     | 0.001          | 0.000     | 0.001          | 0.000             | 0.000          | 0.000     | 0.000          | 0.000         | 0.000          | 0.000     | 0.000          |
| Low-income workers (%)  | 0.007     | 0.272          | 0.018     | 0.069          | 0.000             | 0.000          | 0.000     | 0.000          | 0.000         | 0.000          | 0.000     | 0.000          |
| <b>Seattle</b>          |           |                |           |                |                   |                |           |                |               |                |           |                |
| Number of observations  | 856       | 849            | 859       | 844            | 1128              | 1115           | 1125      | 1110           | 1150          | 1139           | 1142      | 1129           |
| Variables               | p-value   |                |           |                |                   |                |           |                |               |                |           |                |
| Poverty rate            | 0.000     | 0.000          | 0.000     | 0.000          | 0.000             | 0.000          | 0.000     | 0.000          | 0.000         | 0.000          | 0.000     | 0.000          |
| Black population (%)    | 0.934     | 0.675          | 0.860     | 0.649          | 0.206             | 0.299          | 0.383     | 0.567          | 0.090         | 0.010          | 0.033     | 0.065          |
| Other races (%)         | 0.000     | 0.000          | 0.000     | 0.000          | 0.039             | 0.000          | 0.036     | 0.000          | 0.057         | 0.122          | 0.174     | 0.015          |
| Owner of no vehicle (%) | 0.000     | 0.000          | 0.000     | 0.000          | 0.000             | 0.000          | 0.000     | 0.000          | 0.000         | 0.000          | 0.000     | 0.000          |
| Low-income workers (%)  | 0.132     | 0.184          | 0.061     | 0.145          | 0.012             | 0.066          | 0.034     | 0.028          | 0.001         | 0.006          | 0.090     | 0.155          |
| <b>San Francisco</b>    |           |                |           |                |                   |                |           |                |               |                |           |                |
| Number of observations  | 592       | 591            | 591       | 591            | 596               | 596            | 595       | 596            | 595           | 596            | 594       | 595            |
| Variables               | p-value   |                |           |                |                   |                |           |                |               |                |           |                |
| Poverty rate            | 0.034     | 0.012          | 0.042     | 0.022          | 0.002             | 0.003          | 0.002     | 0.001          | 0.011         | 0.021          | 0.009     | 0.032          |
| Black population (%)    | 0.373     | 0.543          | 0.387     | 0.399          | 0.206             | 0.148          | 0.185     | 0.138          | 0.689         | 0.220          | 0.652     | 0.288          |
| Other races (%)         | 0.109     | 0.101          | 0.100     | 0.249          | 0.373             | 0.740          | 0.544     | 0.631          | 0.384         | 0.771          | 0.357     | 0.818          |
| Owner of no vehicle (%) | 0.000     | 0.038          | 0.000     | 0.023          | 0.001             | 0.131          | 0.000     | 0.085          | 0.000         | 0.061          | 0.000     | 0.049          |
| Low-income workers (%)  | 0.192     | 0.667          | 0.094     | 0.823          | 0.007             | 0.230          | 0.028     | 0.198          | 0.114         | 0.110          | 0.090     | 0.155          |
| <b>Salt Lake City</b>   |           |                |           |                |                   |                |           |                |               |                |           |                |
| Number of observations  | 551       | 586            | 560       | 590            | 935               | 927            | 940       | 931            | 901           | 906            | 894       | 902            |
| Variables               | p-value   |                |           |                |                   |                |           |                |               |                |           |                |
| Poverty rate            | 0.000     | 0.000          | 0.000     | 0.000          | 0.000             | 0.000          | 0.000     | 0.000          | 0.000         | 0.000          | 0.000     | 0.000          |
| Black population (%)    | 0.045     | 0.007          | 0.055     | 0.014          | 0.095             | 0.008          | 0.324     | 0.013          | 0.057         | 0.013          | 0.161     | 0.025          |
| Other races (%)         | 0.002     | 0.000          | 0.037     | 0.000          | 0.005             | 0.000          | 0.039     | 0.000          | 0.015         | 0.002          | 0.289     | 0.005          |
| Owner of no vehicle (%) | 0.000     | 0.000          | 0.002     | 0.000          | 0.000             | 0.000          | 0.000     | 0.000          | 0.000         | 0.000          | 0.000     | 0.000          |
| Low-income workers (%)  | 0.125     | 0.924          | 0.804     | 0.957          | 0.002             | 0.007          | 0.004     | 0.002          | 0.001         | 0.000          | 0.010     | 0.017          |

## 7 Goodness of fit statistics of multilevel models: Accessibility with 30-minute travel time

**Table S9 | Goodness of fit statistics of the multilevel binary logit models for the changes in transit-based access to food and healthcare during peak hours using a 30-minute total travel time threshold.**

|                   |                  | Peak                        |                             | Off-peak                    |                             |
|-------------------|------------------|-----------------------------|-----------------------------|-----------------------------|-----------------------------|
|                   |                  | Lockdown                    | Post-lockdown               | Lockdown                    | Post-lockdown               |
| Grocery           | Number of obs.   | 27691                       | 27588                       | 27556                       | 27499                       |
|                   | Number of groups | 22                          | 22                          | 22                          | 22                          |
|                   | Goodness of fit  | LL: -6186.9<br>AIC: 12395.9 | LL: -6086.7<br>AIC: 12195.3 | LL: -6158.0<br>AIC: 12338.0 | LL: -6052.4<br>AIC: 12126.8 |
| Health non-urgent | Number of obs.   | 31550                       | 31077                       | 31598                       | 31042                       |
|                   | Number of groups | 22                          | 22                          | 22                          | 22                          |
|                   | Goodness of fit  | LL: -3428.1<br>AIC: 6878.2  | LL: -3500.5<br>AIC: 7023.0  | LL: -3300.8<br>AIC: 6623.6  | LL: -3937.8<br>AIC: 7897.5  |
| Health urgent     | Number of obs.   | 30887                       | 30861                       | 30813                       | 30675                       |
|                   | Number of groups | 22                          | 22                          | 22                          | 22                          |
|                   | Goodness of fit  | LL: -3570.9<br>AIC: 7163.9  | LL: -3370.9<br>AIC: 6763.8  | LL: -3525.8<br>AIC: 7073.6  | LL: -3341.6<br>AIC: 6705.1  |

Notes: LL: Log-likelihood; AIC: Akaike information criterion

## 8 Spatial patterns of reductions in transit-based accessibility during off-peak hours

Fig. S2 represents the percentages of block groups with loss of accessibility during off-peak hours using a travel time threshold of 30 minutes. Most cities showed a similar pattern of accessibility loss and recovery from the lockdown to the post-lockdown phase, regardless of whether peak or off-peak hours were considered. However, a few cities had some deviations between peak and off-peak hours. In terms of access to food, cities with differences between peak and off-peak hours include New York, Columbus, Philadelphia, Madison, Salt Lake City, Atlanta, and Los Angeles. Again, Philadelphia, Seattle, Phoenix, Ann Arbor, and Atlanta exhibited differences in accessibility losses to non-urgent and urgent health care facilities between peak and off-peak hours. For the rest of the cities, the differences in the probability of losing access to food and health care between peak and off-peak hours were less than 1%.

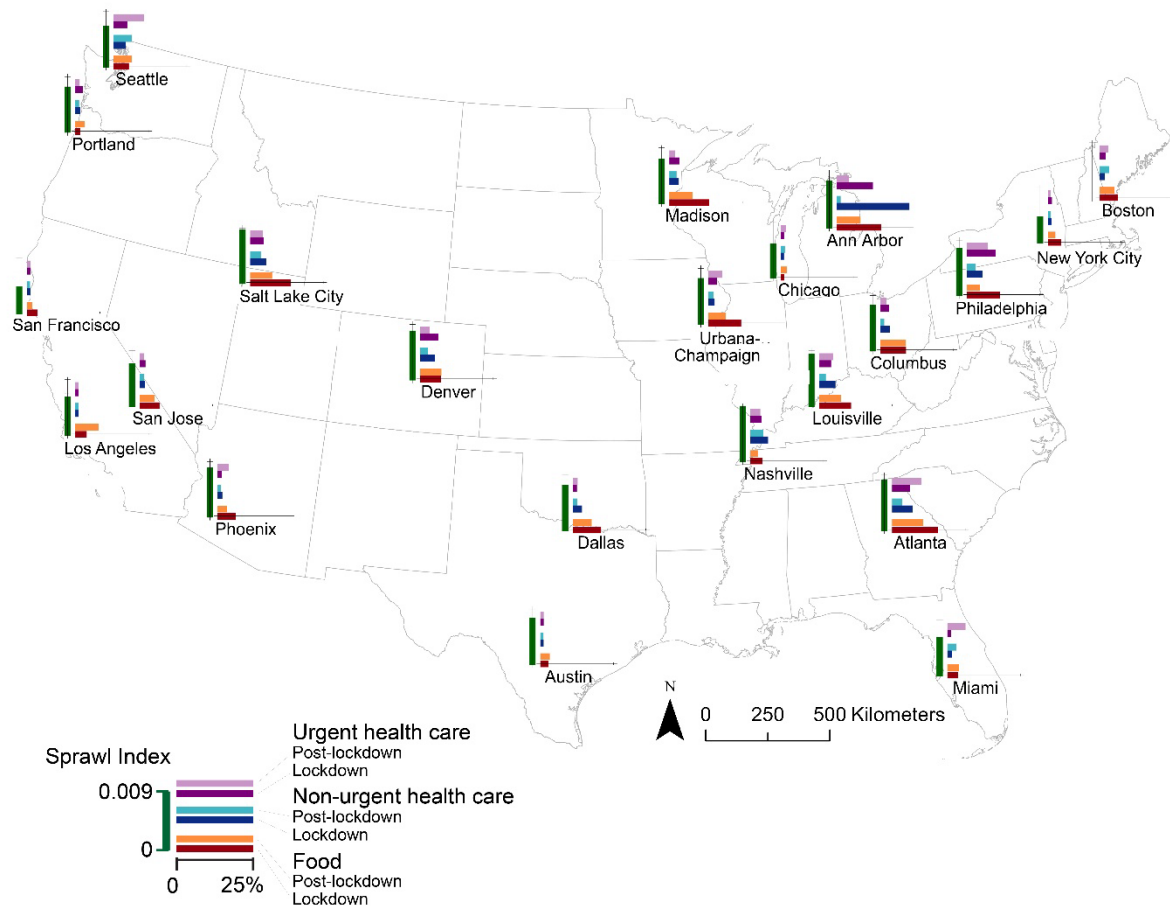

Notes: Horizontal bars on the right represent the probability of losing access to food and health care. Vertical green bars represent urban sprawl index. Whiskers on both axes represent the maximum values of urban sprawl and the probability of losing transit access.

Fig. S2 | Probability of losing transit access in the lockdown and post-lockdown phases (off-peak hours).

### 9 Sensitivity analysis: Accessibility with 45-minutes travel time

We obtained similar results in terms of the direction of effects for most variables when conducting a similar analysis with a 45-minutes travel time threshold (Fig. S3). However, the magnitude and significance of the model coefficients differ between these two sets of models in some cases. For instance, the effects of the poverty rate and populations of other races vary between models generated with 30-minute and 45-minute travel time thresholds. Meanwhile, other results were consistent with the main analysis: block groups with high shares of black populations and low-income workers were more likely to experience transit service cuts regardless of the travel time threshold used for measuring accessibility. The interactions between socio-economic variables show that the influences on accessibility losses during the lockdown and post-lockdown phases were similar to those found in the main analysis with a 30-minute travel time threshold.

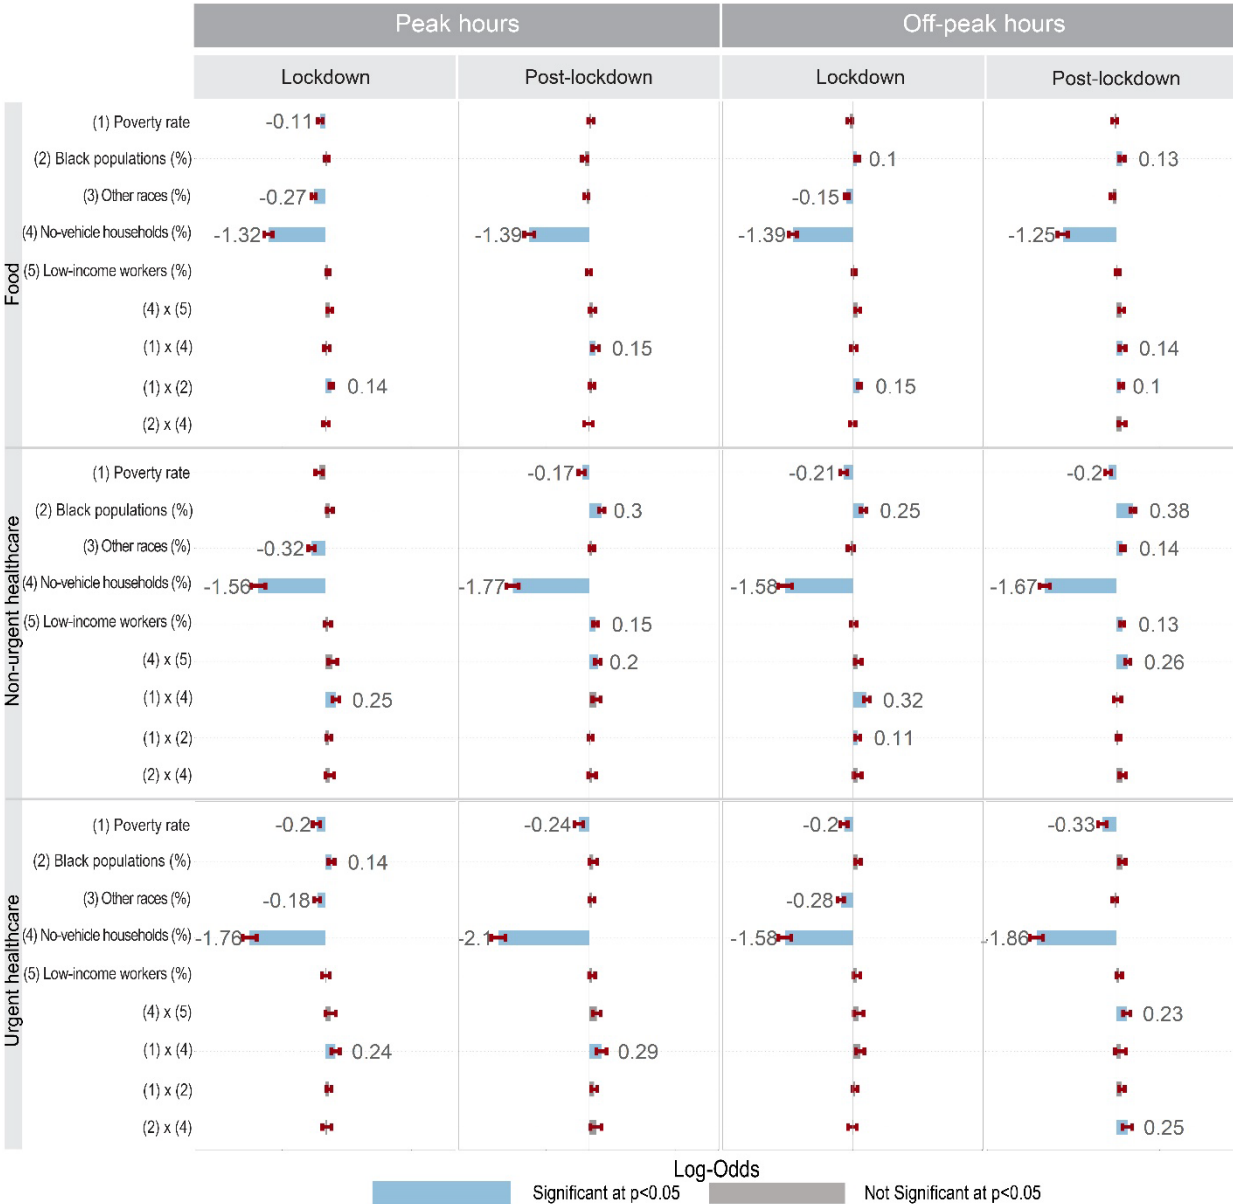

Fig. S3 | Influence of variables on losing transit-based access to food, urgent health care, and non-urgent health care during the peak and off-peak hours of the lockdown and post-lockdown phases, compared to the pre-lockdown phase, using a travel time threshold of 45 minutes. All variables were measured at the census block group level. Blue and grey bars respectively represent the significant and non-significant coefficients of multilevel binary logit models. Significance is indicated at the p<0.05 level. The values of significant coefficients are mentioned beside the blue bars. Red lines represent 95% confidence intervals. Dependent variable: loss of access (yes/no). Socio-demographic and urban form variables were extracted from the American Community Survey 5-year estimates 2014-2018 and Smart Location Database.

The correlations between urban sprawl index and percentages of block groups that lost access show similar results for both the 30-minute and 45-minute travel time thresholds (Fig. S4). In other words, sprawled cities were more likely to experience transit service cuts and subsequent reductions in food and health care access regardless of the travel time thresholds used for the analysis. In addition, the correlations for the 45-minute travel time also appear to be statistically significant during the post-lockdown phase in terms of access to food, whereas this was not the case with the 30-minute travel time threshold.

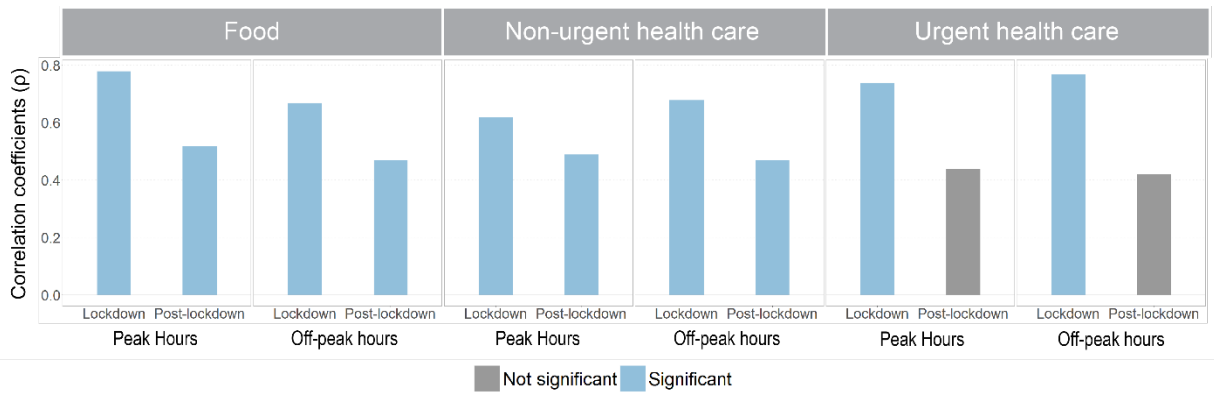

Fig. S4 | Correlation between urban sprawl index and the percentage of block groups that lost accessibility in the various phases, using a travel time threshold of 45 minutes. The y-axis shows Spearman's rank-order correlation coefficient ( $\rho$ ). Blue bars represent significant  $\rho$ 's (at  $p < 0.05$ ) and grey bars represent insignificant  $\rho$ 's. Higher values of  $\rho$  indicate a stronger correlation between urban sprawl and the percentage of block groups where transit service was cut. Boston was excluded from this analysis due to the missing sprawl index.



## References

- Campello, R.J.G.B., Moulavi, D., Sander, J., 2013. Density-Based Clustering Based on Hierarchical Density Estimates, in: Pei, J., Tseng, V.S., Cao, L., Motoda, H., Xu, G. (Eds.), *Advances in Knowledge Discovery and Data Mining, Lecture Notes in Computer Science*. Springer Berlin Heidelberg, Berlin, Heidelberg, pp. 160–172. [https://doi.org/10.1007/978-3-642-37456-2\\_14](https://doi.org/10.1007/978-3-642-37456-2_14)
- FRED Economic Data, 2019. Mean Commute Time [WWW Document]. FRED Economic Data. URL <https://fred.stlouisfed.org/release?rid=415> (accessed 8.24.21).
- GTFS, 2020. OpenMobilityData - Public transit feeds from around the world [WWW Document]. URL <https://transitfeeds.com/> (accessed 5.3.21).
- Hahsler, M., Piekenbrock, M., Doran, D., 2019. dbSCAN: Fast Density-Based Clustering with R. *J. Stat. Soft.* 91. <https://doi.org/10.18637/jss.v091.i01>
- InfoGroup, 2019. InfoGroup [WWW Document]. Infogroup. URL <https://www.infogroup.com/our-data/>
- Kelobonye, K., McCarney, G., Xia, J. (Cecilia), Swapan, M.S.H., Mao, F., Zhou, H., 2019. Relative accessibility analysis for key land uses: A spatial equity perspective. *Journal of Transport Geography* 75, 82–93. <https://doi.org/10.1016/j.jtrangeo.2019.01.015>
- OpenStreetMap, 2020. OpenStreetMap [WWW Document]. OpenStreetMap. URL <https://www.openstreetmap.org/> (accessed 6.17.21).
- OpenTripPlanner, 2021. Open Trip Planner: Multimodal Trip Planning [WWW Document]. URL <https://www.opentripplanner.org/> (accessed 8.12.21).
- Ramsey, K., Bell, A., 2014. Smart location database. Washington, DC.
- US Census Bureau, 2020. 2014-2018 American Community Survey 5-Year Estimates [WWW Document]. URL <https://data.census.gov/cedsci/> (accessed 7.31.20).
- US Census Bureau, 2017. Average One-Way Commuting Time by Metropolitan Areas [WWW Document]. The United States Census Bureau. URL <https://www.census.gov/library/visualizations/interactive/travel-time.html> (accessed 8.24.21).
